# Supplementary material for: A versatile ex vivo technique for assaying tumor angiogenesis and microglia in the brain
Source: PubMed Central journal article supplement (PMC4811501; doi:10.18632/oncotarget.6550), 2015-12-11
Supplement: oncotarget-07-1838-s001.pdf [file oncotarget-07-1838-s001.pdf]

## SUPPLEMENTARY FIGURES

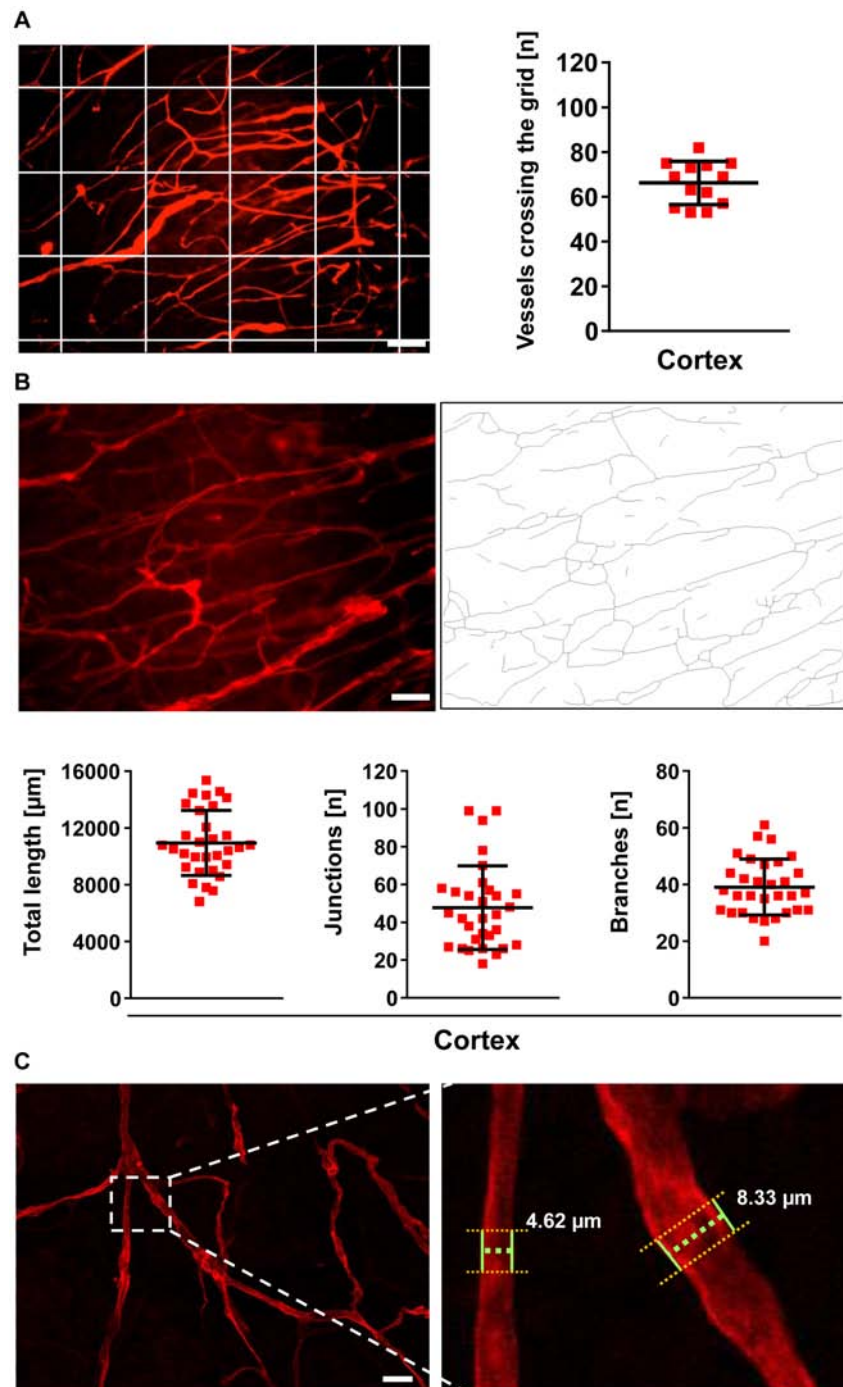

**Supplementary Figure S1: Quantitative assessment of various established angiogenesis analysis tools.** Divergent approaches for the analysis of vasculature are given. (A. right panel) The grid method for vessels density measurement is shown. (A left panel) Quantification of vessels with the grid method representing number of vessels crossing the grid. Scale bar represent  $20 \mu\text{m}$  ( $n = 9$ ) B. Quantification different vascular parameters with the Image J software and Angiogenesis tools plugin. We considered three parameters relevant in tumor angiogenesis and physiology: Total vessels length, number of junctions and branches. Scale bars represents  $20 \mu\text{m}$ . C. Vessels diameter measurement in length of vessels with Image J and ZEN software (Carl Zeiss). Scale bar represents  $20 \mu\text{m}$ . Error bars represent SD value.

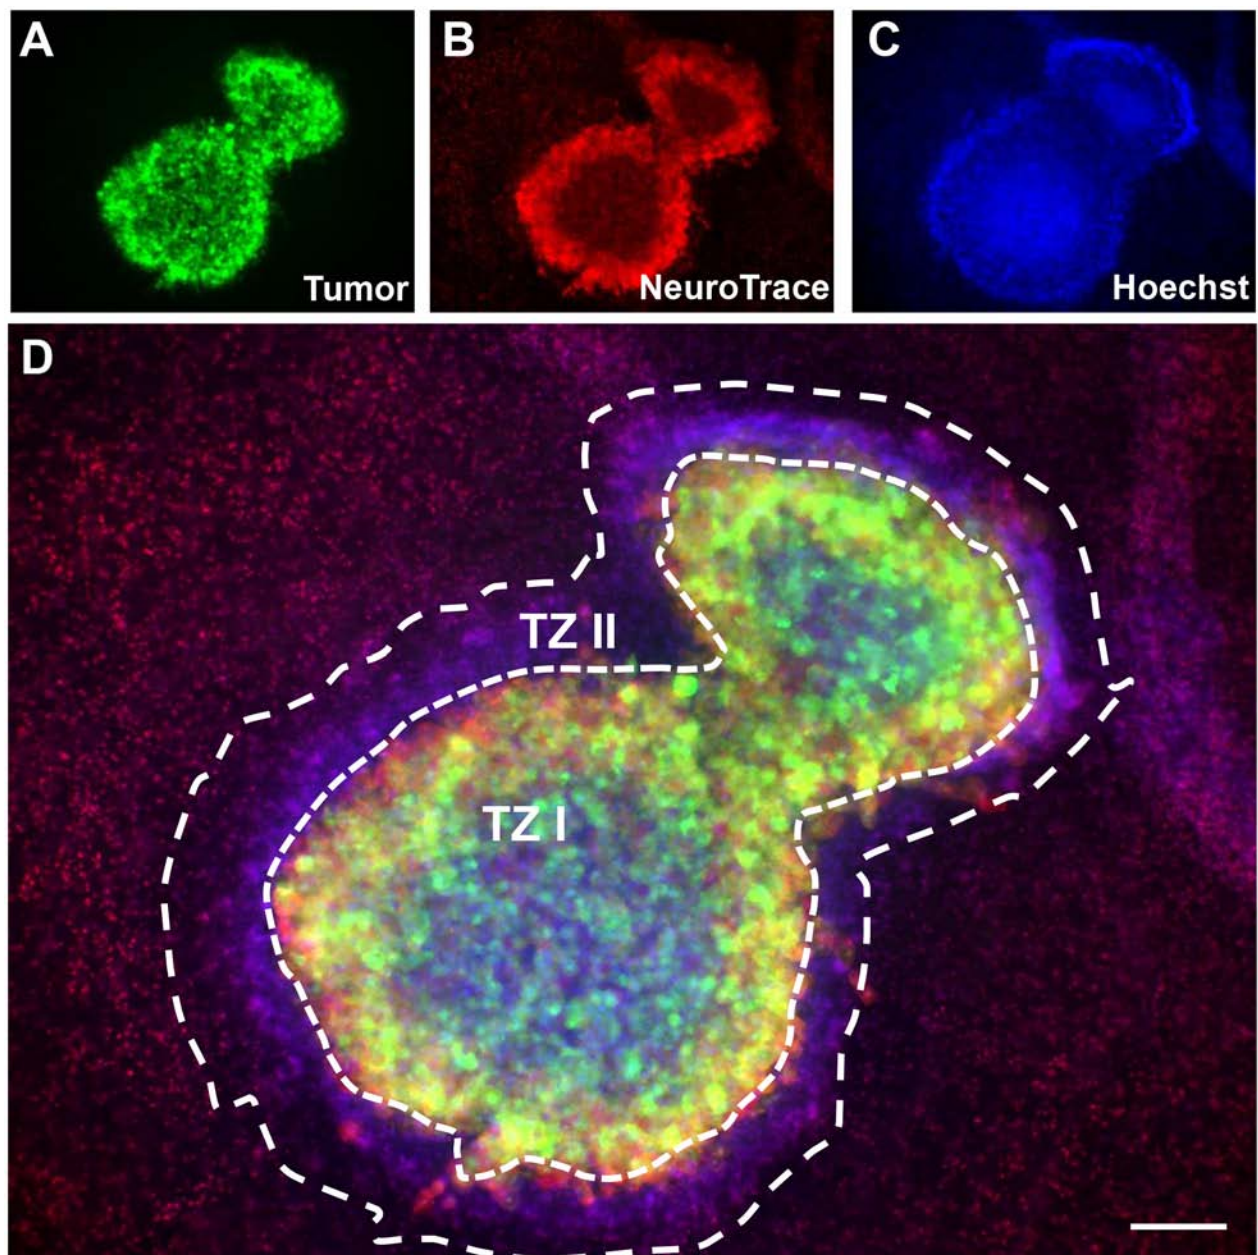

**Supplementary Figure S2: Analysis of cell death and tumor zones in the VOGIM.** **A.** GFP signal (green) of a tumor-implanted brain slice. After tumor implantation, glioma cells form a bulk and secrete factors shaping their specific tumor microenvironment. **B.** A particular peritumoral zone (TZ II) appears challenged with disturbed neuronal layering. The peritumoral zone is characterized by a rim-like structure around the tumor bulk. Representative image of the same slice stained for NeuroTrace (red). NeuroTrace stains specifically neurons or neuronal-associated endoplasmatic reticulum. Note, that neurons within the TZ II appear disrupted and show soften and blurry staining characteristics and lose their typical punctuated appearance. **C.** Total cell nuclei staining is shown (blue, stained with Hoechst 33258). **D.** Representative merged image of A-C. Total cell nuclei staining is shown (blue, stained with Hoechst 33258), tumor (green) and neurons (red) are given. The merged picture shows the typical breaking-up of the neuronal cell structure in the peritumoral TZ II zone. Scale bar represents 100  $\mu\text{m}$ .
